# Supplementary material for: Identification of plaque ruptures using a novel discriminative model comprising biomarkers in patients with acute coronary syndrome
Source: PubMed Central journal article supplement (PMC7677551; doi:10.1038/s41598-020-77413-3), 2020-11-19
Supplement: 41598_2020_77413_MOESM1_ESM.pdf [file 41598_2020_77413_MOESM1_ESM.pdf]

**Identification of plaque ruptures using a novel discriminative model comprising biomarkers in patients with acute coronary syndrome**

Hyungdon Kook<sup>1</sup>, MD, Duck Hyun Jang<sup>1</sup>, MD, Jong-Ho Kim, PhD<sup>1</sup>, Jae-Young Cho<sup>2</sup>, MD, Hyung Joon Joo<sup>1</sup>, MD, Sang-A Cho<sup>3</sup>, MS, Jae Hyoung Park<sup>1</sup>, MD, Soon Jun Hong<sup>1</sup>, MD, \*Cheol Woong Yu<sup>1</sup>, MD, \*Do-Sun Lim<sup>1</sup>, MD

<sup>1</sup>Division of Cardiology, Department of Internal Medicine, Korea University Anam Hospital, Korea University School of Medicine, Seoul, Korea

<sup>2</sup>Department of Cardiovascular Medicine, Regional Cardiocerebrovascular Center, Wonkwang University Medical Center, Iksan, Korea

<sup>3</sup>Health Insurance Review and Assessment Service, Wonju, Korea

\*Last two authors are co-corresponding authors.

Supplementary Figure 1. Scattered plot of peak CK-MB between Rupture group and Non-rupture group. Red lines indicate median value with interquartile range.

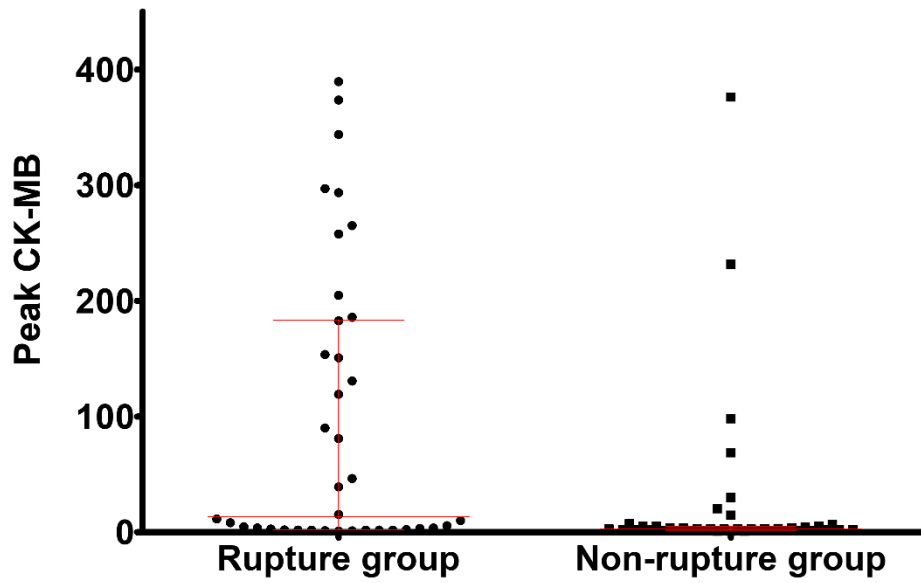

Supplementary Table 1. Comparison of biomarker levels between Non-rupture group and Rupture group in patients with MI.

|                             | Rupture group<br>(n=19) | Non-rupture group<br>(n=10) | p-value |
|-----------------------------|-------------------------|-----------------------------|---------|
| Troponin I, ng/mL           | 13.90±34.00             | 17.64±34.52                 | 0.791   |
| Peak CK-MB, ng/mL           | 179.27±123.43           | 84.30±124.76                | 0.060   |
| High-sensitivity CRP (mg/L) | 10.42±22.84             | 12.34±27.53                 | 0.862   |
| sLOX-1 (pg/mL)              | 405.44±324.54           | 74.61±84.52                 | <0.001  |
| NGAL (ng/mL)                | 66.15±22.74             | 56.73±20.34                 | 0.282   |
| MMP-9 (ng/mL)               | 23.69±19.11             | 10.98±7.98                  | 0.018   |
| WBC, x10 <sup>3</sup> /μL   | 11.27±4.08              | 8.75±2.37                   | 0.045   |

Data are presented as mean±standard deviation. MI = myocardial infarction; CK-MB = creatine kinase-muscle/brain; CRP = C-reactive protein; sLOX-1 = soluble lectin-like oxidized low-density lipoprotein receptor-1; NGAL = neutrophil gelatinase-associated lipocalin; MMP-9 = matrix metalloproteinase-9
